# Supplementary material for: A novel ratiometric fluorescent probe for selective detection of bisulfite in living cells
Source: Royal Society of Chemistry journal article supplement (doi:10.1039/c6ra27347e), 2017-01-01
Supplement: c6ra27347e1.pdf [file c6ra27347e1.pdf]

## Electronic Supplementary Information

### **A novel ratiometric fluorescent probe for selective detection of bisulfite in living cells**

Zhen Chen, Fengzao Chen, Yuanchao Sun, Heng Liu\*, Hanping He, Xiuhua Zhang,  
Shengfu Wang

Hubei Collaborative Innovation Center for Advanced Organic Chemical Materials, Ministry of Education Key Laboratory for the Synthesis and Application of Organic Functional Molecules & College of Chemistry and Chemical Engineering, Hubei University, Wuhan 430062, PR China.

\*Corresponding author: H. Liu, E-mail: [liuheng11b@hubu.edu.cn](mailto:liuheng11b@hubu.edu.cn).

# 1. Structure characterizations for APCT

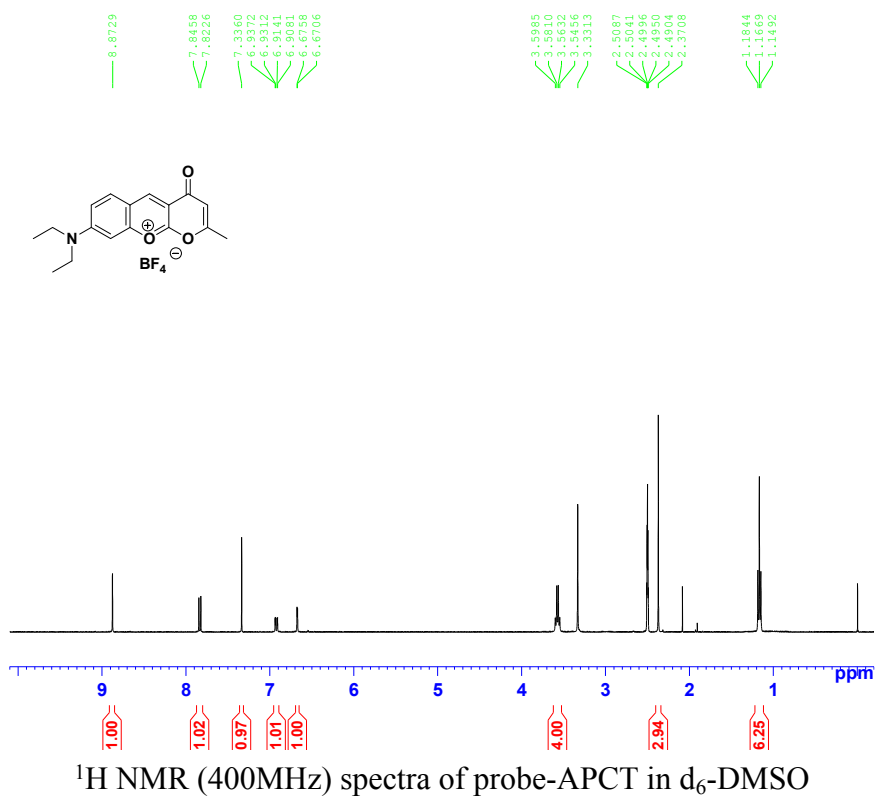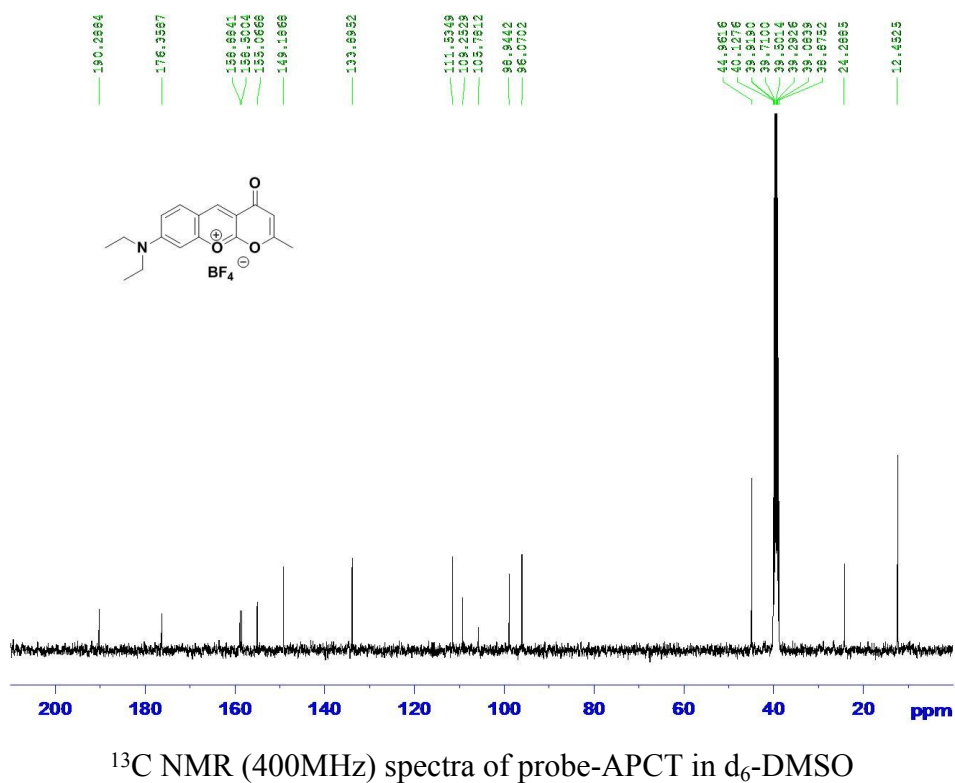

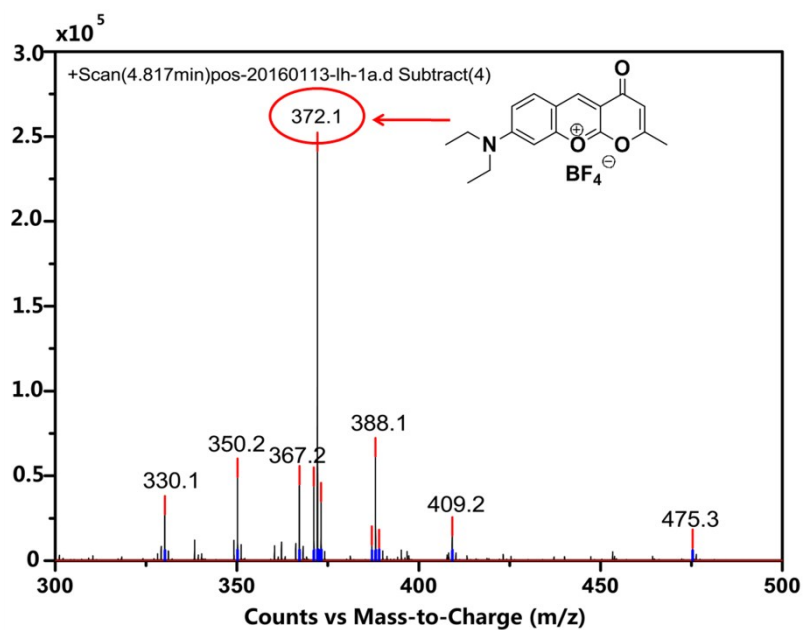

Mass spectrum of probe-APCT

## 2. Additional experiment data

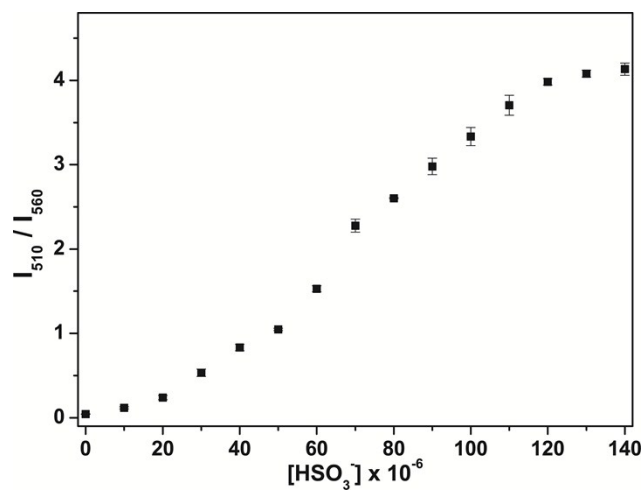

**Fig.S1** The relationship between ratiometric responses ( $I_{510}/I_{560}$ ) of probe-APCT (20  $\mu\text{M}$ ) and the concentration of  $\text{HSO}_3^-$

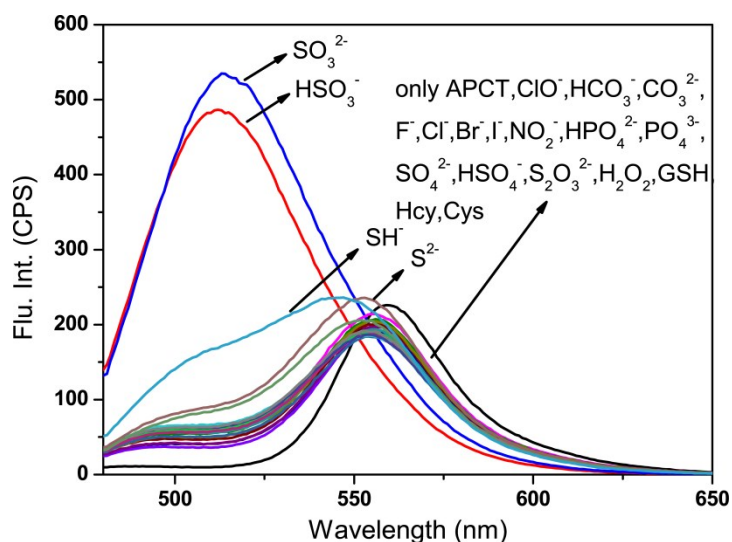

**Fig.S2** Fluorescence spectra of probe-APCT (20  $\mu$ M) upon addition of other physiological interfering species (6 equiv). All the data were performed after 5 min mixing in in pH=7.4 Tris buffer solution containing 70 % DMSO (v/v) at 25  $^{\circ}$ C.  $\lambda_{\text{ex}} = 465 \text{ nm}$  , slit width:  $d_{\text{ex}} = d_{\text{em}} = 3 \text{ nm}$ .

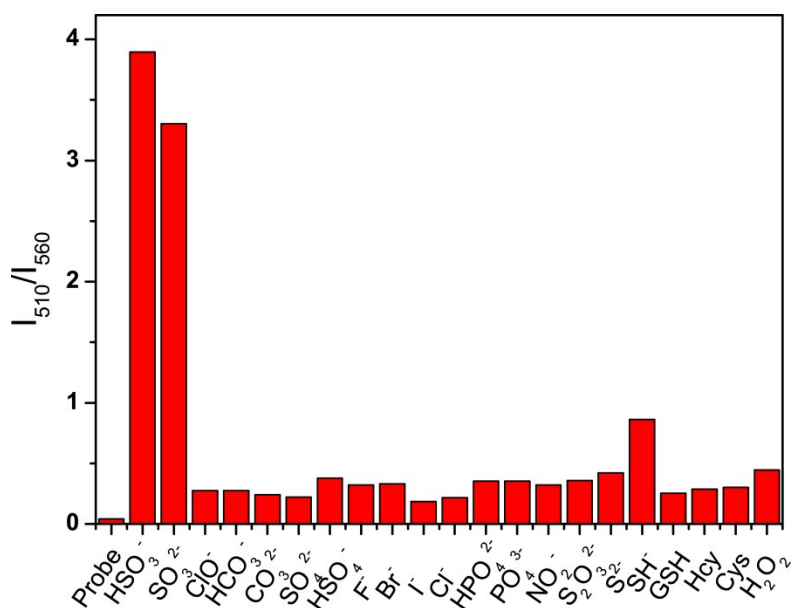

**Fig.S3** Fluorescence intensity ratio ( $I_{510}/I_{560}$ ) of probe-APCT (20  $\mu$ M) toward 6 equiv interfering species in pH=7.4 Tris buffer solution containing 70 % DMSO (v/v) at 25  $^{\circ}$ C.  $\lambda_{\text{ex}} = 465 \text{ nm}$  , slit width:  $d_{\text{ex}} = d_{\text{em}} = 3 \text{ nm}$ .

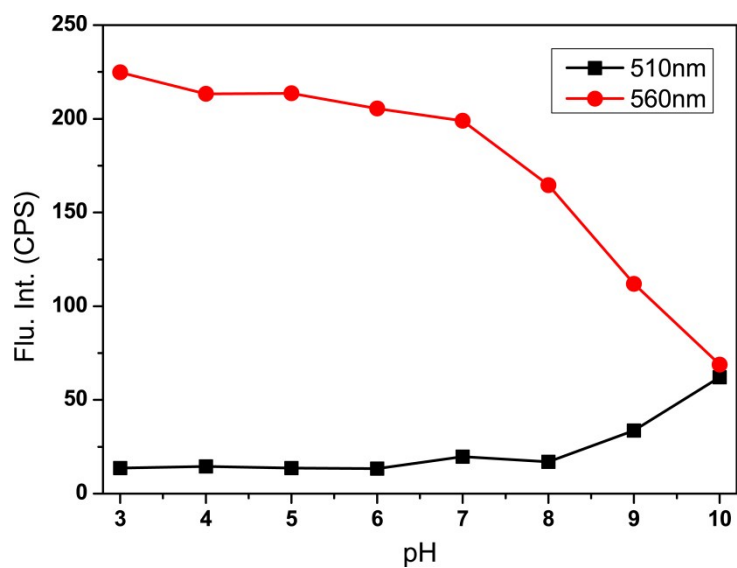

**Fig.S4** The fluorescence intensities at 560 nm and 510 nm of probe-APCT (20  $\mu$ M) at different pH values.

Compound ID : p4  
 Sample ID : EW5378-61-P2A5  
 Injection Vol : 3ul  
 Location : vial82  
 Acq Method : d:\method5-95AB\_R\_220&254.lcm  
 Org DateFile : D:\data\1608\160821\EW5378-61-P2A5.lcd  
 Injection Date : 2016-08-21 14:29:26  
 Instrument : LCMS-H 15-105  
 Column : Chromolith@Flash RP-18E 25-2MM

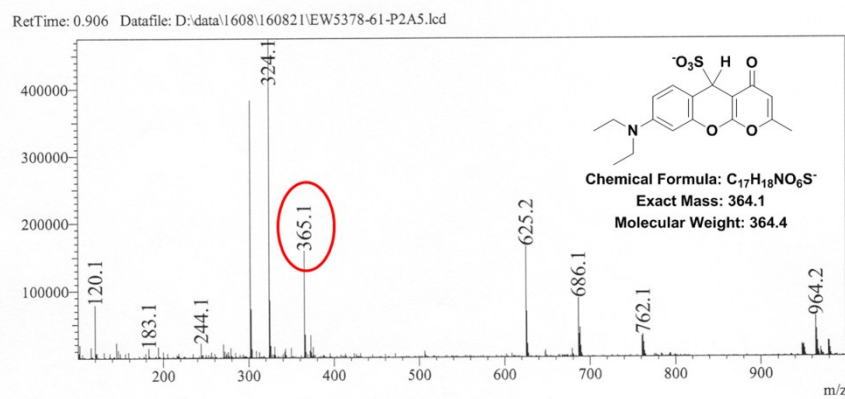

**Fig.S5** MS of  $[APCT+HSO_3^-]^+$  Calcd for  $C_{17}H_{19}NO_6S$  365.1, Found 365.1.

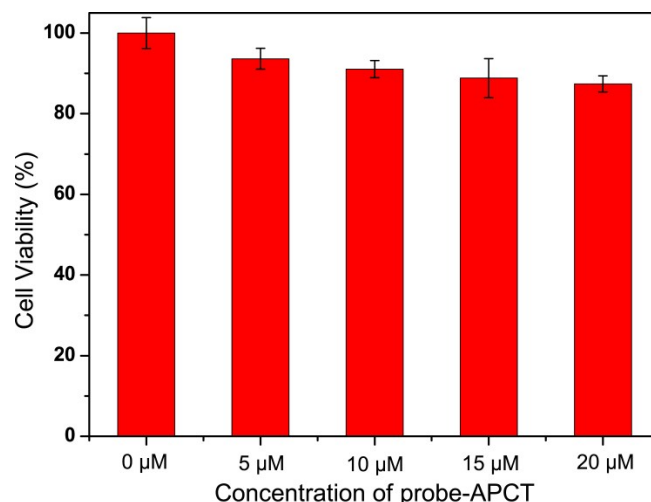

**Fig.S6** Cytotoxicity of probe-APCT evaluated on HeLa cells by the standard CCK-8 assay. The cells were incubated with probe-APCT (0, 5, 10, 15 and 20  $\mu\text{M}$ ) for 12 h.

### 3. Table 1. Comparison of fluorescent probe for $\text{HSO}_3^-$

| Probes                                                                              | Response time  | Linear range        | Detection limit        | Reference                              |
|-------------------------------------------------------------------------------------|----------------|---------------------|------------------------|----------------------------------------|
| 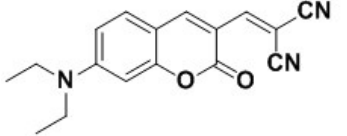 | 30 s           | 0-200 $\mu\text{M}$ | $5.8 \times 10^{-5}$ M | Analyst, 2013, 138, 3018-3025.         |
|  | 5 min          | 0-15 $\mu\text{M}$  | $3.8 \times 10^{-7}$ M | Chem. Commun., 2013,49, 2637-2639      |
|  | Within Seconds | 0-100 $\mu\text{M}$ | $3.3 \times 10^{-7}$ M | Org. Biomol. Chem., 2015,13, 8663-8668 |
|  | 60 min         | 0-320 $\mu\text{M}$ | $5 \times 10^{-6}$ M   | RSC Adv., 2012, 2, 10869-10873         |
|  | 120 min        | 0-100 $\mu\text{M}$ | $1 \times 10^{-7}$ M   | Analyst, 2014, 139, 3373-3377.         |

|                                                                                     |        |                         |                                |                                            |
|-------------------------------------------------------------------------------------|--------|-------------------------|--------------------------------|--------------------------------------------|
| 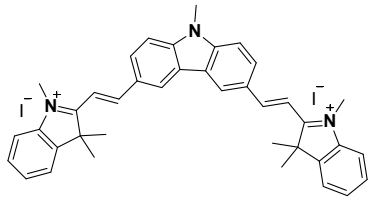   | 2 min  | 0-40 $\mu\text{M}$      | $3 \times 10^{-5} \text{ M}$   | RSC Adv.,<br>2016, 6, 18662-<br>18666.     |
|    | 30 s   | 0-24 $\mu\text{M}$      | $1.5 \times 10^{-7} \text{ M}$ | RSC Adv.,<br>2016,6, 79830-<br>79835       |
|    | 3 min  | 0.3-50<br>$\mu\text{M}$ | $9 \times 10^{-8} \text{ M}$   | Biomaterials.<br>2015, 56, 1-9.            |
|   | 20 min | 0-2.5 mM                | $6.9 \times 10^{-7} \text{ M}$ | Dyes. Pigments.<br>2015, 120, 322-<br>327  |
|  | < 15 s | 0.25-2<br>$\mu\text{M}$ | $8.3 \times 10^{-9} \text{ M}$ | Anal. Chem.<br>2015, 87,<br>609-616        |
|  | 2 min  | 0-8 $\mu\text{M}$       | $2.2 \times 10^{-7} \text{ M}$ | Dyes. Pigments.<br>2015, 120, 213-<br>219. |
|  | 5 min  | 20-120<br>$\mu\text{M}$ | $6.1 \times 10^{-7} \text{ M}$ | This work                                  |
